# Supplementary material
Source: MDPI journal article supplement (https://www.mdpi.com/2073-445X/11/10/1857)
Supplement: s1 [file s1]

## Supplementary Material

**Table S1.** Main resources based to promote agritourism - Pearson Qui-Square

| Categories                                            | Description                                        | Pearson Qui-Square |
|-------------------------------------------------------|----------------------------------------------------|--------------------|
| <b>1.1 Local genetic resources [0.002]</b>            | Autochthonous crops varieties and livestock breeds | 0.002***           |
| <b>1.2 Wildlife and nature [0.112]</b>                | Wild animals                                       | 0.112              |
|                                                       | Nature reserve                                     | 0.005***           |
| <b>1.3 Water bodies [0.004]</b>                       | Rivers, reservoirs, natural pools                  | 0.004***           |
| <b>1.4 Geomonuments [0.208]</b>                       | Distinctive granite morphologies                   | 0.208              |
| <b>Pearson Chi-Square</b>                             | <b>Landscape Based</b>                             | <b>0.010**</b>     |
|                                                       | Olive grove                                        | <.001***           |
|                                                       | Vineyard                                           | 0.103              |
|                                                       | Chestnut tree                                      | 0.358              |
| <b>2.1 Agriculture crops [0.001]</b>                  | Fruit tree                                         | 0.006***           |
|                                                       | Medicinal/aromatic plants                          | 0.023***           |
|                                                       | Fresh vegetables                                   | 0.105              |
|                                                       | Pastures (corn/cereals)                            | 0.077              |
|                                                       | Sheep                                              | 0.003***           |
|                                                       | Goats                                              | 0.358              |
|                                                       | Cattle                                             | 0.156              |
| <b>2.2 Agriculture livestock breeds [0.002]</b>       | Iberian Pig                                        | 0.156              |
|                                                       | Horses                                             | 0.117              |
|                                                       | Donkey                                             | 0.189              |
|                                                       | Chicken and Duck                                   | 0.117              |
|                                                       | Bee                                                | 0.189              |
|                                                       | Cork oak ( <i>Quercus suber</i> )                  | 0.006***           |
| <b>2.3 Mediterranean forest [0.005]</b>               | Holm oak ( <i>Quercus ilex</i> )                   | 0.006***           |
|                                                       | Oak ( <i>Quercus pyrenaica</i> )                   | 0.006***           |
|                                                       | Mediterranean forest                               | 0.139              |
|                                                       | Strawberry tree ( <i>Arbutus unedo</i> )           | 0.518              |
| <b>2.4 Forestry products [0.189]</b>                  | Timber and cork extraction                         | 0.189              |
| <b>Pearson Chi-Square</b>                             | <b>Agriculture Based</b>                           | <b>0.003***</b>    |
|                                                       | Olive Oil                                          | <.001**            |
| <b>3.1 Agri-Food products [0.001]</b>                 | Cheese                                             | 0.103              |
|                                                       | Wine                                               | 0.139              |
|                                                       | Meat                                               | 0.189              |
|                                                       | Olive-Derived                                      | 0.189              |
|                                                       | Jam                                                | 0.048**            |
|                                                       | Sauces                                             | 0.258              |
| <b>3.2 Other processed agri-food products [0.104]</b> | Bread                                              | 0.258              |
|                                                       | Cakes and Snacks                                   | --                 |
|                                                       | Chestnut Flour                                     | --                 |
|                                                       | Sausages                                           | 0.873              |
|                                                       | Granola                                            | 0.515              |
|                                                       | Honey                                              | 0.139              |
| <b>3.3 Wild resources [0.114]</b>                     | Mushrooms                                          | 0.518              |
|                                                       | Herbal Tea Plants                                  | 0.103              |

|                                                          |                                                                             |                 |
|----------------------------------------------------------|-----------------------------------------------------------------------------|-----------------|
|                                                          | Acorn                                                                       | 0.139           |
| <b>3.4 Local products PDO and PGI [0.103]</b>            | PDO cheese, PDO olive oil, Cherry PGI                                       | 0.103           |
| <b>3.5 Local breed [0.003]</b>                           | Local animal breed (caw, pig, sheep, donkey)                                | 0.057**         |
| <b>3.6 Other products [0.335]</b>                        | Artisans' candles                                                           | 0.358           |
|                                                          | sheep wool                                                                  | 0.518           |
|                                                          | soaps                                                                       | 0.518           |
|                                                          | oils                                                                        | 0.358           |
| <b>Pearson Chi-Square</b>                                | <b>Agri-food Based</b>                                                      | <b>0.003***</b> |
| <b>4.1 Cultural Landscape resources 0.011[]</b>          | Stone walls                                                                 | 0.384           |
|                                                          | Vineyard                                                                    | 0.103           |
|                                                          | Terraces                                                                    | 0.850           |
|                                                          | Autochthonous crops                                                         | 0.002***        |
|                                                          | Meadows and pastures                                                        | 0.039**         |
|                                                          | Traditional olive grove                                                     | 0.147           |
|                                                          | Beehouse                                                                    | 0.641           |
| <b>4.2. Cultural and historical heritage [0.270]</b>     | Castles, fortifications, walls                                              | 0.270           |
| <b>4.3 Thermal waters [0.641]</b>                        | Thermal pools                                                               | 0.641           |
| <b>4.4 Entertainment and cultural facilities [0.421]</b> | Museums, cultural centre                                                    | 0.540           |
| <b>Pearson Chi-Square</b>                                | <b>Cultural Based</b>                                                       | <b>0.110</b>    |
| <b>5.1 Distinctive local customs [0.961]</b>             | Paschal traditions, Folklore,                                               | 0.954           |
| <b>5.2 Foods [0.254]</b>                                 | Local dishes based on local products (olive oil, cheese, meat, wine)        | 0.763           |
| <b>5.3 Festivals and fairs [0.077]</b>                   | Ethnographic heritage, rural/traditional fairs (organization/participation) | 0.139           |
| <b>5.4 Local Human Capital [0.003]</b>                   | Local knowledge                                                             | 0.010**         |
| <b>5.5 Vernacular architecture [0.460]</b>               | Predominantly stone and wood buildings – Schist                             | 0.031           |
|                                                          | Predominantly stone and wood buildings – Granite                            | 0.907           |
|                                                          | Mills                                                                       | 0.258           |
| <b>5.6 Historical agricultural features [0.156]</b>      | Oil Presses                                                                 | 0.077           |
|                                                          | Wine Cellar                                                                 | 0.189           |
|                                                          | Fountain                                                                    | 0.358           |
|                                                          | Distillery                                                                  | 0.518           |
|                                                          | Cheese factory                                                              | 0.358           |
| <b>Pearson Chi-Square</b>                                | <b>Rural and immaterial heritage Based</b>                                  | <b>0.070</b>    |
| <b>6.1 Small and peripheral areas [0.187]</b>            | Historic villages                                                           | 0.881           |
|                                                          | Border villages                                                             | 0.748           |
|                                                          | Natural area                                                                | 0.005           |
|                                                          | Agricultural exploitation                                                   | <.001***        |
| <b>6.2 Thematic and scenic routs [0.471]</b>             | Tracks, trails, bike path                                                   | 0.471           |
| <b>Pearson Chi-Square</b>                                | <b>Rural settlements Based</b>                                              | <b>0.070</b>    |
| <b>7.1 Non-rural technologies [0.065]</b>                | Design                                                                      | 0.006           |
|                                                          | Renewable energy                                                            | 0.604           |
| <b>7.2 Organization resources [0.614]</b>                | Specialized training                                                        | 0.754           |
|                                                          | Quality certification                                                       | 0.396           |

|                                                                 |                                          |          |
|-----------------------------------------------------------------|------------------------------------------|----------|
| <b>7.3 Communicational and promotional resources</b><br>[0.116] | Webpage                                  | 0.105    |
|                                                                 | Online sales (agri-food products)        | 0.031**  |
|                                                                 | Online sales (accommodations)            | 0.860    |
|                                                                 | Packaging (accommodation + activities)   | 0.320    |
| <b>7.4 Social networks platforms and contents</b> [<.001]       | Digital content related with agritourism | <.001*** |
| <b>7.5 Touristic Facilities</b> [0.020]                         | Swimming Pool                            | <.001*** |
|                                                                 | Gardens                                  | 0.291    |
|                                                                 | Bicycles                                 | 0.277    |
|                                                                 | Sports Infrastructures                   | 0.057    |
|                                                                 | Spa and Beauty                           | 0.784    |
| <b>Pearson Chi-Square</b>                                       | <b>Not specifically rural Based</b>      | 0.087    |

0.05 > p > 0.01; (\*\*) 0.01 > p > 0.001; (\*\*\*) p < 0.001
